# Supplementary material for: Fe/N co-doped carbon microspheres as a high performance electrocatalyst for the oxygen reduction reaction
Source: Royal Society of Chemistry journal article supplement (doi:10.1039/c5ra19620e), 2015-01-01
Supplement: c5ra19620e1.pdf [file c5ra19620e1.pdf]

## Electronic Supporting Information

### **Fe/N co-doped Carbon Microspheres as a High Performance Electrocatalyst for Oxygen Reduction Reaction**

*Pengpeng Cheng<sup>1</sup>, Shuoshuo Li<sup>1</sup>, Ruchun Li, Jing Yan, Wendan Yu, Xiaofeng Shao, Zhaoxia Hu, and Dingsheng Yuan\**

<sup>1</sup> Both authors have the same contribution.

\*Department of Chemistry, Jinan University, Guangzhou 510632, PR China E-mail:

[tydsh@jnu.edu.cn](mailto:tydsh@jnu.edu.cn), Fax: +8620 8522 1697

## Formula

the *K-L* equations:

$$1/j_{\text{lim}} = 1/j_{\text{lev}} + 1/j = 1/(B\omega^{1/2}) + 1/j_k \quad (1)$$

$$B = 0.62nFC_0(D_0)^{2/3}\nu^{-1/6} \quad (2)$$

$$j_k = nFkC_0 \quad (3)$$

where  $j_{\text{lim}}$  (mA cm<sup>-2</sup>) is the measured current density, which is related to Levich current ( $j_{\text{lev}}$ ) and kinetic current ( $j_k$ ).  $\omega$  is the electrode rotation rate,  $F$  is the Faraday constant (96485 C mol<sup>-1</sup>),  $C_0$  is the bulk concentration of O<sub>2</sub> ( $C_0 = 1.21 \times 10^{-6}$  mol cm<sup>-3</sup>),  $D_0$  is the diffusion coefficient of O<sub>2</sub> ( $D_0 = 1.9 \times 10^{-5}$  cm<sup>2</sup> s<sup>-1</sup>),  $\nu$  is the kinematic viscosity of the electrolyte (0.01 cm<sup>2</sup> s<sup>-1</sup>), and  $k$  is the electron-transfer rate constant.

Table S1. Comparison of the electrocatalytic activity of NCMS-Fe and the reported catalysts for ORR in alkaline solution.

| Catalyst    | Reference electrode | electrolyte | Onset potential (V) | Reference |
|-------------|---------------------|-------------|---------------------|-----------|
| NCNC700/900 | Ag/AgCl             | 0.1M KOH    | -0.13               | [1]       |
| NCS-H       | Ag/AgCl             | 0.1M KOH    | -0.10               | [2]       |
| NCNTs/G     | SCE                 | 0.1M KOH    | -0.136              | [3]       |
| N-HCNPs     | Ag/AgCl             | 0.1M KOH    | -0.08               | [4]       |
| N-GC        | Ag/AgCl             | 0.1M KOH    | -0.05               | [5]       |
| NCMS-Fe     | Ag/AgCl             | 0.1M KOH    | 0.025               | This work |

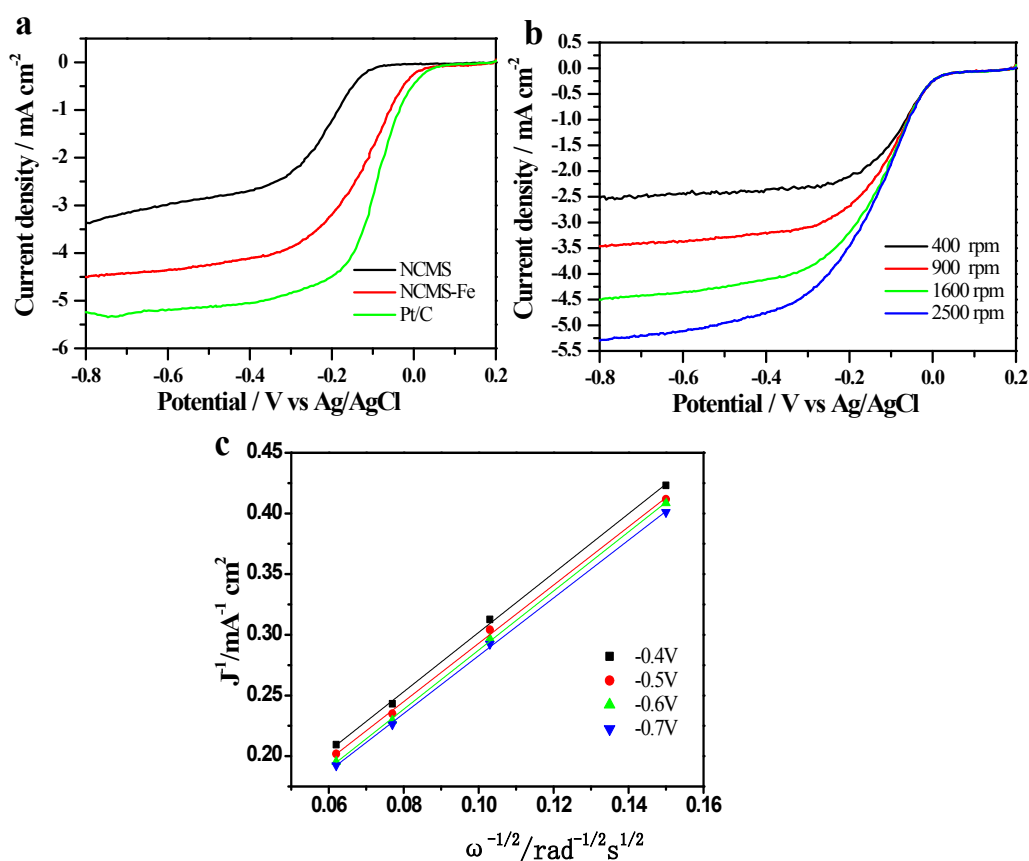

**Fig. S1.** (a) Polarization curves (RDE) of NCMS, NCMS-Fe and the commercial 20 wt% Pt/C at 1600 rpm in  $O_2$ -saturated  $0.1 \text{ mol L}^{-1} \text{ KOH}$ ; (b) RDE voltammograms at different rotating rates in  $0.1 \text{ mol L}^{-1} \text{ KOH}$  solution saturated with  $O_2$  with a scan rate rate of  $10 \text{ mV s}^{-1}$ ; (c) Koutecky–Levich plot ( $j^{-1}$  vs.  $\omega^{-1/2}$ ) obtained from the RDE data at -0.4, -0.5, -0.6 and -0.7 V of NCMS-Fe.

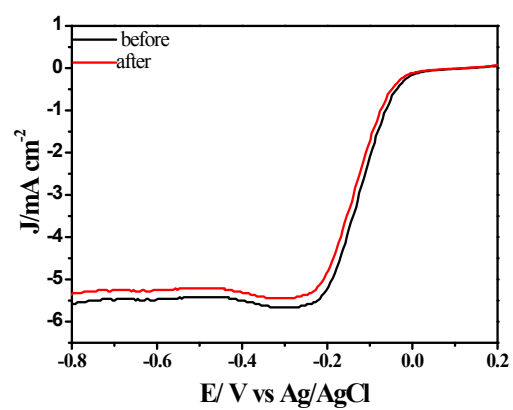

**Fig. S2** ORR polarization (RRDE) plots of NCMS-Fe before and after 2000 potential cycles in O<sub>2</sub>-saturated 0.1 M KOH.

## Reference

- [1]S. Chen, J. Y. Bi, Y. Zhao, L. J. Yang, C. Zhang, Y. W. Ma, Q. Wu, X. Z. Wang and Z. Hu, *Adv. Mater*, 2012, **24**, 5593-5597.
- [2]X. M. Zhou, Z. Yang, H. G. Nie, Z. Yao, L. J. Zhang and S. M. Huang, *J. power. sources*, 2011, **196**, 9970-9974.
- [3]Y. W. Ma, L. Y. Sun, W. Huang, L. R. Zhang, J. Zhao, Q. L. Fan and W. Huang, *J. Phys. Chem. C*, 2011, **115**, 24592-24597.
- [4]G. X. Ma, R. R. Jia, J. H. Zhao, Z. J. Huang, C. Song, S. P. Jia and Z. P. Zhu, *J. Phys. Chem. C*, 2011, **115**, 25148-25154.
- [5]J. Yan, H. Meng, W. D. Yu, X. L. Yuan, W. R. Lin, W. P. Ouyang, D. S. Yuan, *Electrochim. Acta*, 2014, **129**, 196-202.
